# Supplementary material for: Polymorphisms of the 11q23.3 Locus Affect the Risk and Mortality of Coronary Artery Disease
Source: MDPI journal article supplement (doi:10.3390/jcm11154532), 2022-08-03
Supplement: s1 [file s1]

**Supplementary Table S1.** Associations between genotypes and serum lipid markers.

| Characteristic                   | Genotypes of rs10750097 |          |        |          |        |          | $\beta$ coefficient<br>P value |                |               |
|----------------------------------|-------------------------|----------|--------|----------|--------|----------|--------------------------------|----------------|---------------|
|                                  | AA                      |          | AG     |          | GG     |          | Kruskal-<br>Wallis<br>test     | AA<br>vs<br>AG | AG vs<br>GG   |
|                                  | Median                  | $\pm$ QD | Median | $\pm$ QD | Median | $\pm$ QD |                                |                |               |
| TC (mmol/L),<br>median $\pm$ QD  | 5.00                    | 0.80     | 4.92   | 0.77     | 4.74   | 0.42     | 0.697                          | 0.08<br>-      | 0.26<br>-     |
| HDL (mmol/L),<br>median $\pm$ QD | 1.37                    | 0.39     | 1.29   | 0.40     | 1.29   | 0.14     | 0.654                          | 0.08<br>-      | 0.08<br>-     |
| LDL (mmol/L),<br>median $\pm$ QD | 2.80                    | 0.85     | 3.00   | 0.63     | 2.63   | 0.76     | 0.523                          | 0.20<br>-      | 0.17<br>-     |
| TG (mmol/L),<br>median $\pm$ QD  | 1.32                    | 0.43     | 1.21   | 0.39     | 1.26   | 0.39     | 0.397                          | 0.11<br>-      | 0.06<br>-     |
|                                  | Genotypes of rs3741298  |          |        |          |        |          | $\beta$ coefficient<br>P value |                |               |
|                                  | CC                      |          | CT     |          | TT     |          | Kruskal-<br>Wallis<br>test     | CC<br>vs<br>CT | CT vs<br>TT   |
|                                  | Median                  | $\pm$ QD | Median | $\pm$ QD | Median | $\pm$ QD |                                |                |               |
| TC (mmol/L),<br>median $\pm$ QD  | 4.70                    | 0.57     | 5.00   | 0.46     | 4.92   | 0.75     | 0.463                          | 0.30<br>-      | 0.22<br>-     |
| HDL (mmol/L),<br>median $\pm$ QD | 1.37                    | 0.37     | 1.28   | 0.42     | 1.37   | 0.39     | 0.456                          | 0.05<br>-      | 0.00<br>-     |
| LDL (mmol/L),<br>median $\pm$ QD | 2.78                    | 0.83     | 2.80   | 0.81     | 2.82   | 0.79     | 0.973                          | 0.02<br>-      | 0.04<br>-     |
| TG (mmol/L),<br>median $\pm$ QD  | 1.32                    | 0.61     | 1.40   | 0.41     | 1.24   | 0.35     | 0.100                          | 0.08<br>-      | 0.08<br>-     |
|                                  | Genotypes of rs1729410  |          |        |          |        |          | $\beta$ coefficient<br>P value |                |               |
|                                  | CC                      |          | CG     |          | GG     |          | Kruskal-<br>Wallis<br>test     | CC<br>vs<br>CG | CG vs<br>GG   |
|                                  | Median                  | $\pm$ QD | Median | $\pm$ QD | Median | $\pm$ QD |                                |                |               |
| TC (mmol/L),<br>median $\pm$ QD  | 4.87                    | 0.85     | 4.97   | 0.74     | 4.93   | 0.74     | 0.811                          | 0.10<br>-      | 0.06<br>-     |
| HDL (mmol/L),<br>median $\pm$ QD | 1.32                    | 0.40     | 1.24   | 0.35     | 1.42   | 0.34     | 0.046 *                        | 0.08<br>0.130  | 0.10<br>1.000 |
| LDL (mmol/L),<br>median $\pm$ QD | 2.72                    | 0.98     | 2.87   | 0.72     | 2.70   | 0.71     | 0.345                          | 0.15<br>-      | 0.02<br>-     |
| TG (mmol/L),<br>median $\pm$ QD  | 1.15                    | 0.37     | 1.30   | 0.37     | 1.37   | 0.50     | 0.078                          | 0.15<br>-      | 0.22<br>-     |

Legend: TC, total cholesterol; HDL, high density lipoprotein; LDL, low density lipoprotein; TG, triglycerides; QD, Quartile Deviation; \*, statistically significant differences ( $P < 0.050$ );  $\beta$ , absolute differences between medians of lipid markers for specific genotypes.

**Supplementary Table S2.** Cardiovascular causes of death in 5-year and 10-year follow-up.

| ICD-10 code | Cause of death                                                                                               | 5-year follow-up |        | 10-year follow-up |        |
|-------------|--------------------------------------------------------------------------------------------------------------|------------------|--------|-------------------|--------|
|             |                                                                                                              | n                | %      | n                 | %      |
| I20.8       | Ischaemic heart diseases. Other forms of angina pectoris.                                                    | 0                | 0,00   | 1                 | 3,13   |
| I21.0       | Ischaemic heart diseases. Acute transmural myocardial infarction of anterior wall.                           | 0                | 0,00   | 1                 | 3,13   |
| I21.9       | Ischaemic heart diseases. Acute myocardial infarction, unspecified.                                          | 6                | 42,86  | 9                 | 28,13  |
| I22.9       | Ischaemic heart diseases. Subsequent myocardial infarction of unspecified site.                              | 2                | 14,29  | 3                 | 9,38   |
| I24.9       | Ischaemic heart diseases. Acute ischaemic heart disease, unspecified.                                        | 0                | 0,00   | 1                 | 3,13   |
| I25.0       | Ischaemic heart diseases. Atherosclerotic cardiovascular disease, so described.                              | 1                | 7,14   | 1                 | 3,13   |
| I25.1       | Ischaemic heart diseases. Atherosclerotic heart disease.                                                     | 0                | 0,00   | 1                 | 3,13   |
| I25.5       | Ischaemic heart diseases. Ischaemic cardiomyopathy.                                                          | 0                | 0,00   | 2                 | 6,25   |
| I25.9       | Ischaemic heart diseases. Chronic ischaemic heart disease, unspecified.                                      | 2                | 14,29  | 6                 | 18,75  |
| I46.9       | Other forms of heart disease. Cardiac arrest, unspecified.                                                   | 0                | 0,00   | 1                 | 3,13   |
| I50.1       | Other forms of heart disease. Left ventricular failure.                                                      | 1                | 7,14   | 1                 | 3,13   |
| I61.6       | Cerebrovascular diseases. Intracerebral haemorrhage, multiple localized.                                     | 0                | 0,00   | 1                 | 3,13   |
| I63.5       | Cerebrovascular diseases. Cerebral infarction due to unspecified occlusion or stenosis of cerebral arteries. | 1                | 7,14   | 1                 | 3,13   |
| I63.9       | Cerebrovascular diseases. Cerebral infarction, unspecified.                                                  | 1                | 7,14   | 1                 | 3,13   |
| I70.2       | Diseases of arteries, arterioles and capillaries. Atherosclerosis of arteries of extremities.                | 0                | 0,00   | 1                 | 3,13   |
| I70.9       | Diseases of arteries, arterioles and capillaries. Generalized and unspecified atherosclerosis.               | 0                | 0,00   | 1                 | 3,13   |
| Σ           |                                                                                                              | 14               | 100,00 | 32                | 100,00 |

ICD-10 – International Statistical Classification of Diseases and Related Health Problem
